# Supplementary material for: Clinicopathological significance of loss of Y chromosome in male meningiomas
Source: Research Square preprint supplement (doi:10.21203/rs.3.rs-6848173/v1), 2025-06-12
Supplement: Supplementary file 1 [file 4265e497234d83c6b0de3306.docx]

**Clinicopathological significance of loss of Y chromosome in male meningiomas**

Maki Sakaguchi1,2, Masafumi Horie1,3*, Yukinobu Ito1, Shingo Tanaka4, Hiroko Ikeda5, Mitsutoshi Nakada4, Akihiko Yoshizawa2, Daichi Maeda1, 3, 6

1. Department of Molecular and Cellular Pathology, Graduate school of Medical Sciences, Kanazawa University, Kanazawa, Japan.
2. Department of Diagnostic Pathology, Nara Medical University, Kashihara, Japan.
3. Division of Molecular and Genomic Pathology, Department of Pathology, Kobe University Graduate School of Medicine, Kobe, Japan.
4. Department of Neurosurgery, Graduate school of Medical Sciences, Kanazawa University, Kanazawa, Japan.
5. Department of Diagnostic Pathology, Kanazawa University Hospital, Kanazawa, Japan.
6. The Garvan Institute of Medical Research, Darlinghurst, New South Wales, Australia.

*Corresponding author

Masafumi Horie, MD, PhD

Division of Molecular and Genomic Pathology, Department of Pathology, Kobe University Graduate School of Medicine

E-mail: mhorie@med.kobe-u.ac.jp

Phone: +81-78-382-5465

FAX: +81-78-382-5479

**Supplementary Fig.1**


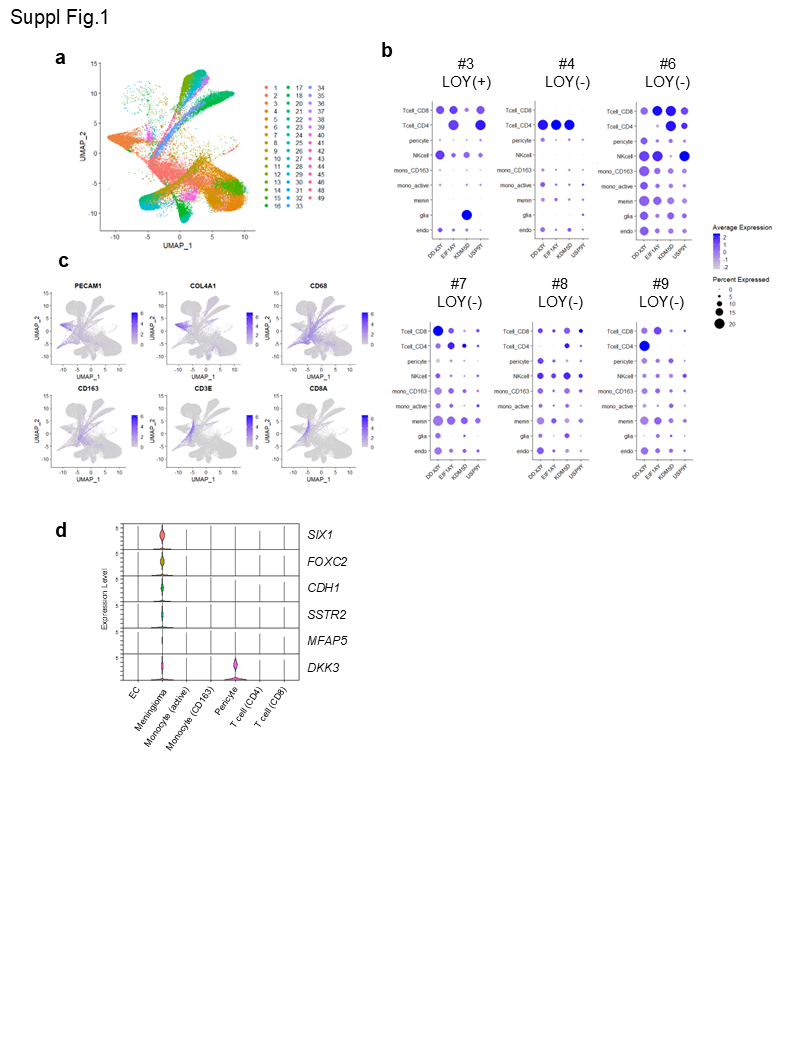


**Supplementary Fig.2**


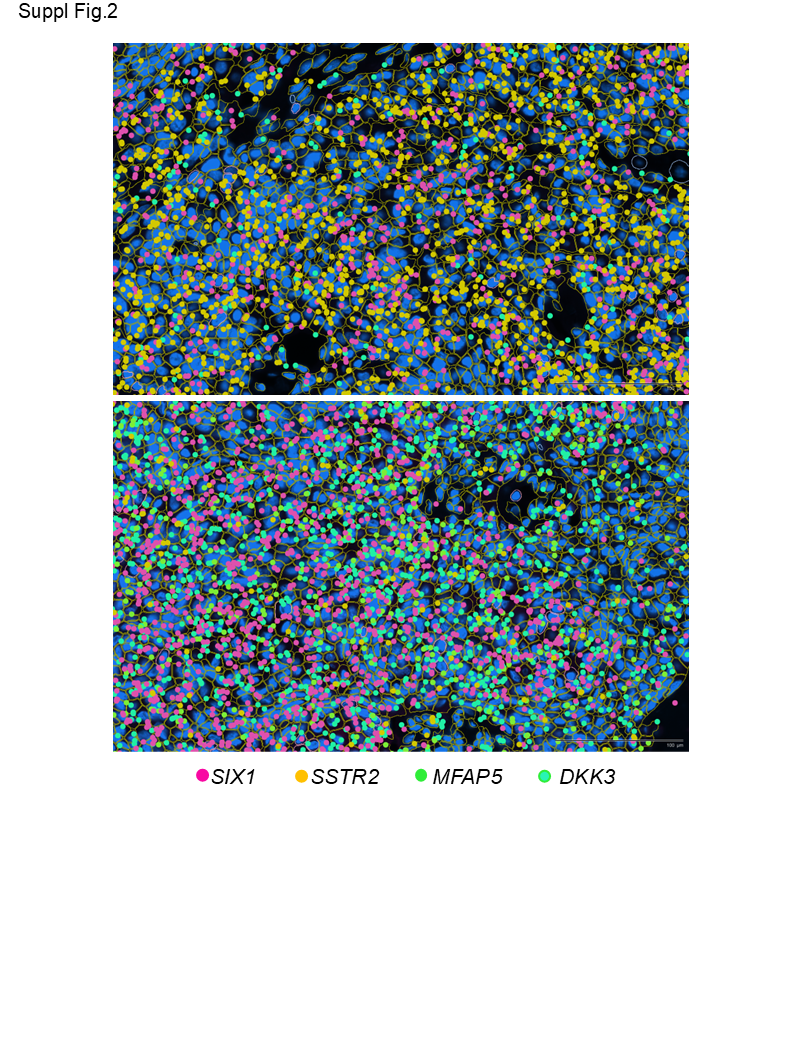


**Supplementary Fig.3**


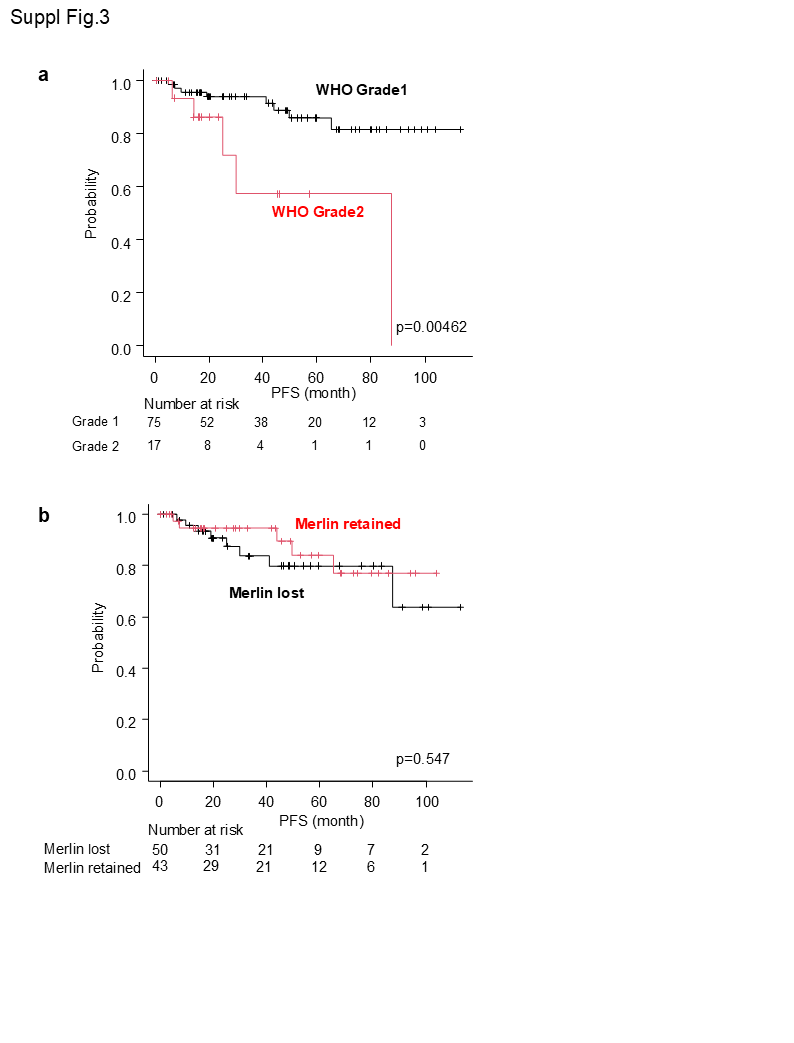


**Supplementary Fig.1**

1. Uniform manifold approximation and projection (UMAP) visualization displaying 49 clusters identified in male meningiomas.
2. Dot plot of Y chromosome gene expression across meningioma cases. Dot size indicates the proportion of cells with detectable transcript expression; color intensity reflects average gene expression levels.
3. Feature plots displaying scaled RNA expression across annotated non-tumor cell types in UMAP space.
4. Violin plots showing the expression levels of *SIX1, FOXC2, CDH1, SSTR2, MFAP5*, and *DKK3* at the single-cell level.

**Supplementary Fig. 2**

Spatial transcriptomic maps showing expression patterns of *SIX1, SSTR2, MFAP5,* and *DKK3*. The upper panel emphasizes predominant *SSTR2* expression, whereas the lower panel illustrates *MFAP5* and *DKK3* enrichment in spatially distinct regions.

**Supplementary Fig. 3**

1. Kaplan–Meier survival curves for progression-free survival stratified by World Health Organization (WHO) grade 1 and grade 2 meningiomas.
2. Kaplan–Meier survival curves comparing progression-free survival in meningiomas with merlin loss versus merlin retention.
